# Supplementary material for: Using underwater video to evaluate the performance of the Fukui trap as a mitigation tool for the invasive European green crab (Carcinus maenas) in Newfoundland, Canada
Source: PeerJ. 2018 Jan 10;6:e4223. doi: 10.7717/peerj.4223 (PMC5767085; doi:10.7717/peerj.4223)
Supplement: Table S1 [file peerj-06-4223-s002.xlsx]

## Sheet: Sheet1
Supplemental Table S1: Summary table of all trap deployments
Deployment	Location	Date & Time Deployed	Date & Time Retrieved	Camera	Duration	Record Time	Total Green Crab
1	Fair Haven	2015-06-09 13:23:00	2015-06-10 12:05:00	N	22:42:00	13:00:00	71
1	Fair Haven	2015-06-09 13:20:00	2015-06-10 12:20:00	Y	23:00:00	13:00:00	225
2	Fair Haven	2015-06-09 13:28:00	2015-06-10 12:26:00	Y	22:58:00	13:00:00	30
2	Fair Haven	2015-06-09 13:30:00	2015-06-10 12:22:00	N	22:52:00	13:00:00	18
3	Fair Haven	2015-06-10 12:28:00	2015-06-11 12:43:00	N	1 day, 0:15:00	13:00:00	62
3	Fair Haven	2015-06-10 14:16:00	2015-06-11 12:42:00	Y	22:26:00	13:00:00	299
4	Fair Haven	2015-06-10 14:13:00	2015-06-11 12:40:00	Y	22:27:00	13:00:00	10
4	Fair Haven	2015-06-10 12:18:00	2015-06-11 12:37:00	N	1 day, 0:19:00	13:00:00	165
5	Little Harbour East	2015-06-22 15:54:00	2015-06-22 18:38:00	Y	2:44:00	2:44:00	0
5	Little Harbour East	2015-06-22 15:58:00	2015-06-22 18:40:00	N	2:42:00	2:42:00	0
6	Little Harbour East	2015-06-22 15:54:00	2015-06-22 18:38:00	Y	2:44:00	2:44:00	0
6	Little Harbour East	2015-06-22 16:04:00	2015-06-22 18:43:00	N	2:39:00	2:39:00	2
7	Boat Harbour	2015-06-23 12:32:00	2015-06-23 20:37:00	Y	8:05:00	8:05:00	0
7	Boat Harbour	2015-06-23 12:34:00	2015-06-23 20:35:00	N	8:01:00	8:01:00	0
8	Boat Harbour	2015-06-23 12:40:00	2015-06-23 20:31:00	Y	7:51:00	7:51:00	5
8	Boat Harbour	2015-06-23 12:42:00	2015-06-23 20:29:00	N	7:47:00	7:47:00	7
9	Boat Harbour	2015-06-23 20:51:00	2015-06-24 09:45:00	Y	12:54:00	12:54:00	0
9	Boat Harbour	2015-06-23 20:45:00	2015-06-24 09:50:00	N	13:05:00	13:00:00	0
10	Boat Harbour	2015-06-24 10:10:00	2015-06-24 19:30:00	N	9:20:00	9:20:00	0
10	Boat Harbour	2015-06-24 10:25:00	2015-06-24 19:15:00	Y	8:50:00	8:50:00	1
11	Boat Harbour	2015-06-24 10:25:00	2015-06-24 19:15:00	Y	8:50:00	8:50:00	0
11	Boat Harbour	2015-06-24 10:26:00	2015-06-24 19:07:00	N	8:41:00	8:41:00	1
12	Boat Harbour	2015-06-24 19:15:00	2015-06-25 09:23:00	N	14:08:00	13:00:00	0
12	Boat Harbour	2015-06-24 19:28:00	2015-06-25 09:28:00	Y	14:00:00	13:00:00	0
13	Boat Harbour	2015-06-24 19:36:00	2015-06-25 09:00:00	N	13:24:00	13:00:00	0
13	Boat Harbour	2015-06-24 20:03:00	2015-06-25 09:10:00	Y	13:07:00	13:00:00	1
14	Boat Harbour	2015-06-25 09:05:00	2015-06-25 18:41:00	N	9:36:00	9:36:00	0
14	Boat Harbour	2015-06-25 09:20:00	2015-06-25 18:28:00	Y	9:08:00	9:08:00	0
15	Boat Harbour	2015-06-25 09:27:00	2015-06-25 18:56:00	N	9:29:00	9:29:00	9
15	Boat Harbour	2015-06-25 09:35:00	2015-06-25 18:45:00	Y	9:10:00	9:10:00	0
16	Boat Harbour	2015-06-25 18:38:00	2015-06-26 08:01:00	Y	13:23:00	13:00:00	0
16	Boat Harbour	2015-06-25 18:42:00	2015-06-26 08:01:00	N	13:19:00	13:00:00	0
17	Boat Harbour	2015-06-25 18:54:00	2015-06-26 08:03:00	Y	13:09:00	13:00:00	0
17	Boat Harbour	2015-06-25 19:00:00	2015-06-26 08:04:00	N	13:04:00	13:00:00	164
18	Port Harmon	2015-07-07 10:18:00	2015-07-07 18:08:00	Y	7:50:00	7:50:00	14
18	Port Harmon	2015-07-07 10:19:00	2015-07-07 17:44:00	N	7:25:00	7:25:00	102
19	Port Harmon	2015-07-07 10:22:00	2015-07-07 18:25:00	Y	8:03:00	8:03:00	6
19	Port Harmon	2015-07-07 10:22:00	2015-07-07 18:09:00	N	7:47:00	7:47:00	47
20	Port Harmon	2015-07-07 18:20:00	2015-07-08 08:20:00	Y	14:00:00	13:00:00	74
20	Port Harmon	2015-07-07 18:24:00	2015-07-08 08:32:00	N	14:08:00	13:00:00	51
21	Port Harmon	2015-07-08 18:23:00	2015-07-09 08:13:00	Y	13:50:00	13:00:00	3
21	Port Harmon	2015-07-08 18:25:00	2015-07-09 08:10:00	N	13:45:00	13:00:00	0
22	Port Harmon	2015-07-09 08:29:00	2015-07-09 18:38:00	Y	10:09:00	10:09:00	36
22	Port Harmon	2015-07-09 08:31:00	2015-07-09 18:37:00	N	10:06:00	10:06:00	25
23	Port Harmon	2015-07-09 19:05:00	2015-07-10 08:05:00	Y	13:00:00	13:00:00	25
23	Port Harmon	2015-07-09 19:07:00	2015-07-10 08:09:00	N	13:02:00	13:00:00	30
24	Bonne Bay	2015-07-11 08:05:00	2015-07-11 20:00:00	Y	11:55:00	11:55:00	0
24	Bonne Bay	2015-07-11 08:27:00	2015-07-11 21:01:00	N	12:34:00	12:34:00	0
25	Bonne Bay	2015-07-11 08:16:00	2015-07-11 20:25:00	Y	12:09:00	12:09:00	0
25	Bonne Bay	2015-07-11 08:21:00	2015-07-11 20:53:00	N	12:32:00	12:32:00	0
26	Bonne Bay	2015-07-11 20:09:00	2015-07-12 08:24:00	Y	12:15:00	12:15:00	0
26	Bonne Bay	2015-07-11 21:03:00	2015-07-12 08:54:00	N	11:51:00	11:51:00	0
27	Bonne Bay	2015-07-11 20:36:00	2015-07-12 08:02:00	Y	11:26:00	11:26:00	0
27	Bonne Bay	2015-07-11 20:55:00	2015-07-12 07:57:00	N	11:02:00	11:02:00	0
28	Bonne Bay	2015-07-12 08:00:00	2015-07-13 08:22:00	N	1 day, 0:22:00	13:00:00	2
28	Bonne Bay	2015-07-12 08:11:00	2015-07-13 08:15:00	Y	1 day, 0:04:00	13:00:00	0
29	Bonne Bay	2015-07-12 08:34:00	2015-07-13 07:32:00	Y	22:58:00	13:00:00	0
29	Bonne Bay	2015-07-12 08:57:00	2015-07-13 07:20:00	N	22:23:00	13:00:00	1
30	Bonne Bay	2015-07-13 07:30:00	2015-07-13 19:53:00	N	12:23:00	12:23:00	0
30	Bonne Bay	2015-07-13 07:41:00	2015-07-13 19:52:00	Y	12:11:00	12:11:00	0
31	Bonne Bay	2015-07-13 08:26:00	2015-07-13 20:06:00	Y	11:40:00	11:40:00	1
31	Bonne Bay	2015-07-13 08:27:00	2015-07-13 20:10:00	N	11:43:00	11:43:00	1
32	Bonne Bay	2015-07-13 20:02:00	2015-07-14 07:28:00	Y	11:26:00	11:26:00	0
32	Bonne Bay	2015-07-13 20:03:00	2015-07-14 07:33:00	N	11:30:00	11:30:00	0
33	Bonne Bay	2015-07-13 20:17:00	2015-07-14 07:24:00	Y	11:07:00	11:07:00	0
33	Bonne Bay	2015-07-13 20:18:00	2015-07-14 07:23:00	N	11:05:00	11:05:00	0
34	Penguin Arm	2015-07-14 19:15:00	2015-07-15 14:09:00	Y	18:54:00	13:00:00	0
34	Penguin Arm	2015-07-14 19:20:00	2015-07-15 14:15:00	N	18:55:00	13:00:00	0
35	Penguin Arm	2015-07-14 19:25:00	2015-07-15 14:17:00	Y	18:52:00	13:00:00	0
35	Penguin Arm	2015-07-14 19:27:00	2015-07-15 14:22:00	N	18:55:00	13:00:00	0
36	Fair Haven	2015-08-18 10:50:00	2015-08-19 10:22:00	Y	23:32:00	13:00:00	107
36	Fair Haven	2015-08-18 11:00:00	2015-08-19 10:30:00	N	23:30:00	13:00:00	166
37	Fair Haven	2015-08-18 10:55:00	2015-08-19 10:25:00	Y	23:30:00	13:00:00	172
37	Fair Haven	2015-08-18 11:05:00	2015-08-19 10:35:00	N	23:30:00	13:00:00	232
38	Fair Haven	2015-08-19 12:30:00	2015-08-20 10:30:00	Y	22:00:00	13:00:00	88
38	Fair Haven	2015-08-19 12:42:00	2015-08-20 10:30:00	N	21:48:00	13:00:00	54
39	Fair Haven	2015-08-19 12:30:00	2015-08-20 10:30:00	Y	22:00:00	13:00:00	196
39	Fair Haven	2015-08-19 12:45:00	2015-08-20 10:30:00	N	21:45:00	13:00:00	213
40	Fox Harbour	2016-06-30 11:55:00	2016-07-01 10:56:00	Y	23:00:00	13:00:00	29
